# Supplementary material for: The preparation of cellulose acetate capsules using emulsification techniques: high-shear bulk mixing and microfluidics
Source: publisher site journal article supplement (doi:10.1515/npprj-2023-0051), 2023-11-13
Supplement: Supplementary file 1 [file j_npprj-2023-0051_suppl_001.docx]

**Supplementary Material**

**The preparation of cellulose acetate capsules using emulsification techniques: high-shear bulk mixing and microfluidics**

Katarzyna Mystek et al.

DOI 10.1515/npprj-2023-0051

Movie showing the ongoing emulsification process, optical microscope image of Emulsion S2, DSC curve of CA, thermal expansion of Capsule S2, optical microscopy image of the actual flow-focusing junction during an ongoing emulsification when both the organic and water phases are stained with the dyes, optical microscope image of the wet PVA-stabilized capsules synthetized via microfluidics with the size distribution profile.


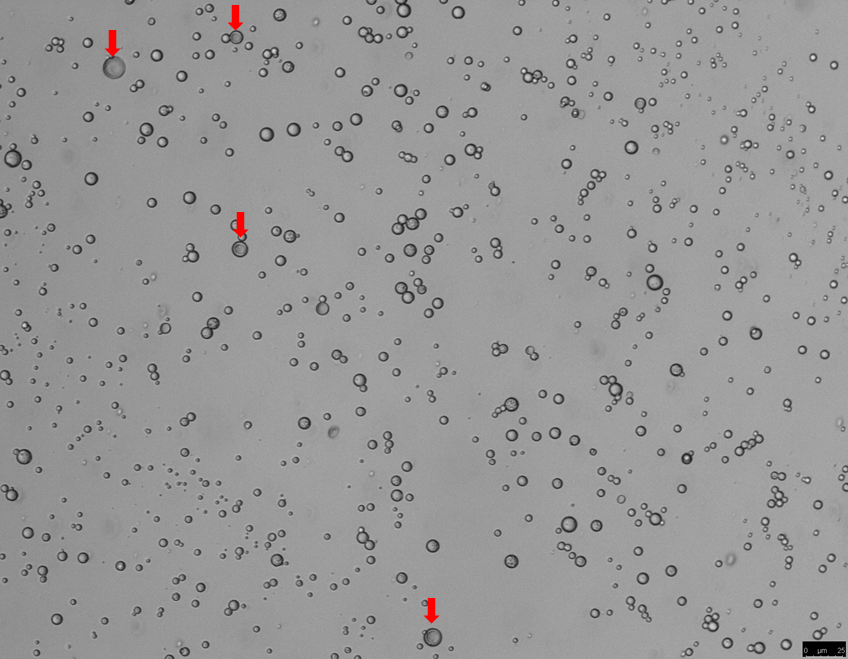


**Supplementary Figure S1:** Optical microscope image of Emulsion S2. The red arrows mark double emulsion droplets.





**Supplementary Figure S2:** DSC curve of the cellulose acetate.


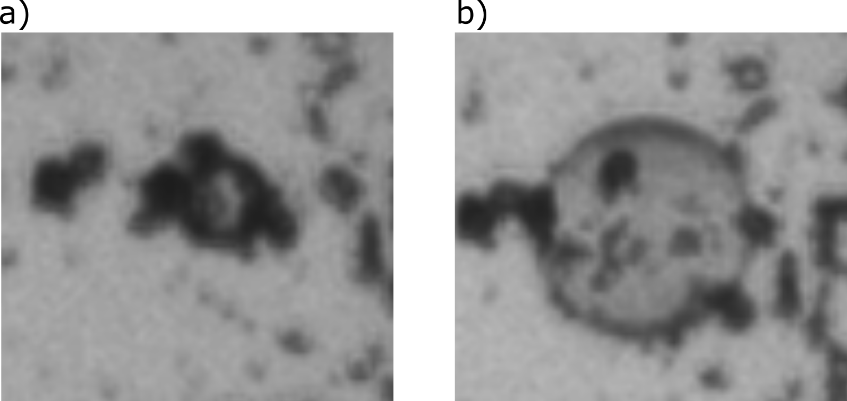


**Supplementary Figure S3:** Thermal expansion of Capsule S2. Images show a capsule in the (a) native (non-expanded) and (b) expanded state.


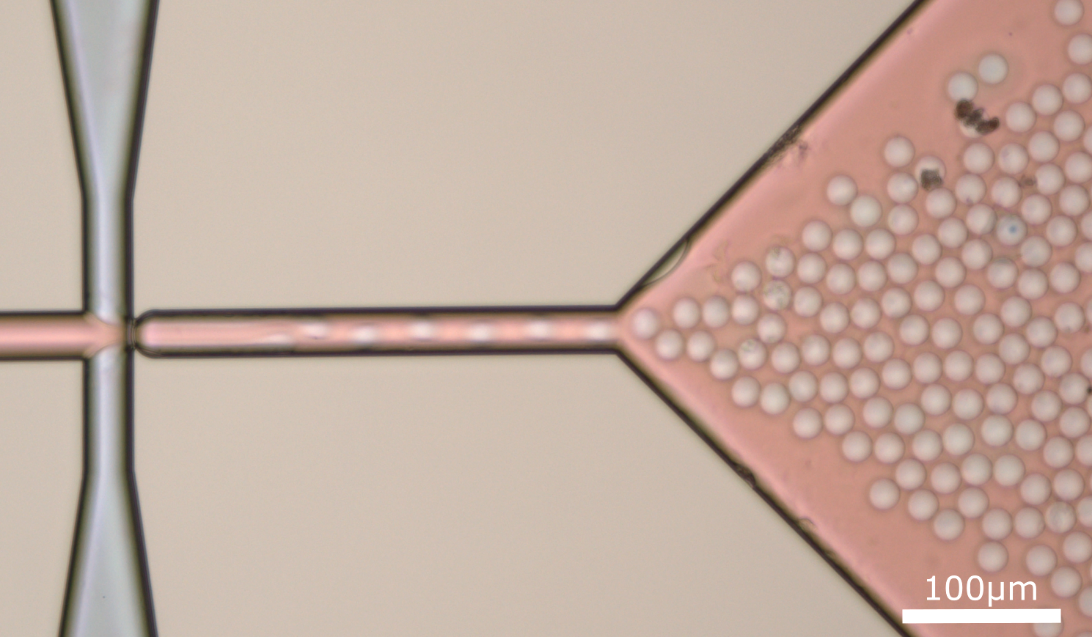


**Supplementary Figure S4:** Optical microscopy image of the actual flow-focusing junction during the emulsification when both the organic and water phases are stained with oil red and methylene blue, respectively.


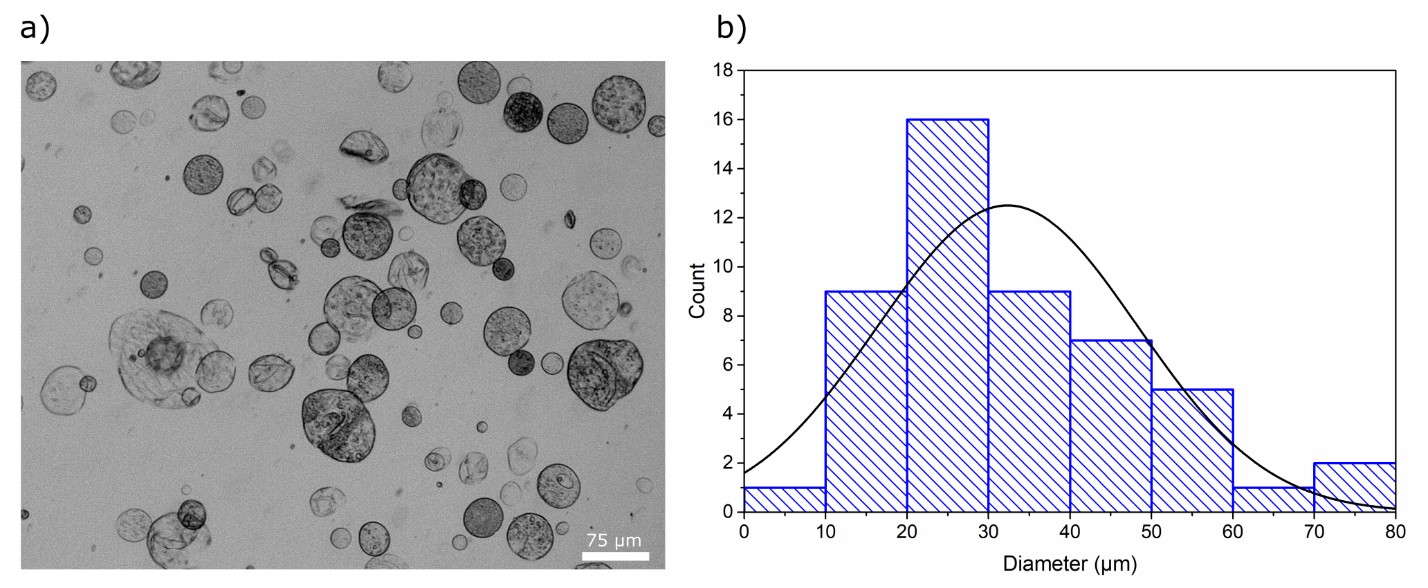


**Supplementary FigureS5:** (a) Optical microscope image of the wet PVA-stabilized capsules synthetized via microfluidics (b) size distribution profile.
